# Supplementary material
Source: publisher figshare collection journal article supplement (https://geolsoc.figshare.com/ndownloader/files/17960525)
Supplement: Supplementary file 1 [file 17960525]

## Sheet: Tabelle1
laevaptychus - symphysis length (mm)	shell diameter (mm)	data from Keupp et al. 2016b
10.2	30.6
10.3	40.7
10.35	50.2
10.6	50.7
30.5	80.7
30.3	90.2
40.9	130.6
60.8	200
70.5	210
80.6	250
lamellaptachus - symphysis length (mm)
41	130
26	75
6,8	17
15	38,5
6	17
4,7	13
4,8	14
6,5	18
7	17,5
8	20
11	29
11	30
12	37
8	22
12	32
9	23,5
9	23,5
6,2	17
6	14
6,2	16
13,2	35,5
9	28
7	17,5
10,1	30
14	30,5
11,6	32
6	15
12,5	34
12	34
12	31
13	37,5
10	30
6	14
8,8	23
7	19
8	20,5
12	29
13	35,5
20	60
9,5	28
11	31
10	27,5
23,5	69
20	65
17	53
13	34
10	22
11	29
9,3	25
16	44
4,6	10,5
5	12,5

## Sheet: Tabelle2
specimen	aptychus type	symphysis length (mm)	calculated maximum shell diameter (mm)
SMNS 63279 - Schweigert	lamellaptychi	8.3	23.5273
	7	7.5	21.1521
		8.3	23.5273
		4.2	11.5067
		9.2	26.213
		6.6	18.4953
		8.3	23.5273
RUB-Pal 12001 Hoffmann, leg. Simonsen	lamellaptychi	5.4	14.9814
	6	5.1	14.1088
RUB-Pal 12002 Hoffmann, leg. Frattigiani	2	7.1	19.9692
	lamellaptychi fragments	6.9	19.379
SNSB-BSPG 2014 XXI 79413	1	10.4	29.8143
	lamellaptychi fragments
SNSB-BSPG 2014 XXI 79412	1	9.7	27.7109
	lamellaptychi fragment
SNSB-BSPG 2014 XXI 79174	3	10	28.6115
	lamellaptychi fragment	8.3	23.5273
		6.6	18.4953
SMNS 70373 - Schweigert	laevaptychi	53	164.828
	2	20	59.2409
SMNS 70503 - Schweigert	laevaptychi	20	59.2409
	2	16.6	48.714
SMNS 70491 - Schweigert	laevaptychus	14.6	42.5707
	fragmented
SMNS 70504 - Schweigert	laevaptychi	13.1	37.9905
	2	x
SMNS 70492 - Schweigert	laevaptychi	6.8	19.0842
	11	5.9	16.4412
		3.6	9.78719
		4.1	11.2192
		x
		4.1	11.2192
		3.6	9.78719
		x
		4.5	12.3712
		3.2	8.64864
		3.2	8.64864
		Median total:	19.9692
		Median lamellaptychi:	22.3397
		Median laevaptychi:	16.4412
